# Supplementary figures and images for: Genome analysis of the smallest free-living eukaryote Ostreococcus tauri unveils many unique features
Source: HighWire-hosted journal article supplement (doi:10.1073/pnas.0604795103), 2006-07-25

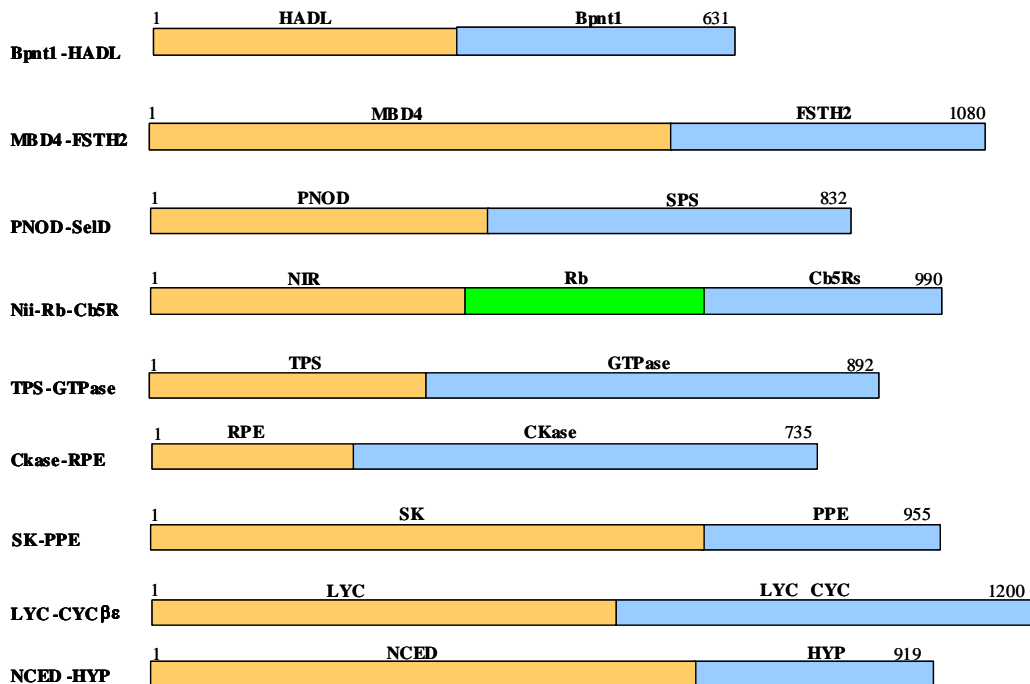

 N-Terminal

 C-Terminal

Supplement: 04795Fig8.pdf [file 04795Fig8.pdf]
